# Supplementary material for: Th17 cells increase in RRMS as well as in SPMS, whereas various other phenotypes of Th17 increase in RRMS only
Source: PubMed Central journal article supplement — Mult Scler J Exp Transl Clin. 2020 Jan 28;6(1):2055217319899695. doi: 10.1177/2055217319899695 (PMC6990617; doi:10.1177/2055217319899695), 2020-01-28
Supplement: MSO899695_Supplemental_material.pdf [file MSO899695_Supplemental_material.pdf]

**Supplementary figure- Flowcytometry data analysis of Th cells from peripheral blood showing gating strategy.** Isolated PBMC were stimulated for 3 hours with PMA and ionomycin and treated with brefeldin for 2 hours. Stimulated PBMC were stained for followed by surface and intracellular markers with antibodies against CD3, CD4, CD45RA, CCR7, CCR6, IFN $\gamma$ , IL-17 and IL-22. For all plots shown, a lymphocyte gate was applied based on forward and side scatter properties (not shown). **A.** Lymphocytes were gated for CD3+CD4+ T cells. **B.** CD3+CD4+ T cells were further gated for total memory (CD45RA-), referred to as CD4+ memory cells. **C.** Expression of IFN $\gamma$ +, IL-17A+, and IFN $\gamma$ + IL-17A+ dual expression gated on CD4+ memory cells. **D.** Expression of IL-22+ and IL-22+ IL-17A+ dual expression cells gated on memory CD4+ memory cells. Expression of CCR6 and IL-17A (**E**), IFN $\gamma$  (**F**) and IL-22 (**G**) gated on CD4+ memory cells. Histograms (Figures **H** to **L**) show representative data demonstrating CCR6 expression of IL-17A+ (**H**), IFN $\gamma$ +, (**I**), dual expression IFN $\gamma$ + IL-17A+ (**J**), IL-22+ (**K**); and IL-22+ IL-17A+ dual expression cells (**L**). Numbers represent the percentage of cells within the quadrant, with negative gates set based on un-stimulated controls.
