# Supplementary figures and images for: Th17 cells increase in RRMS as well as in SPMS, whereas various other phenotypes of Th17 increase in RRMS only
Source: PubMed Central journal article supplement — Mult Scler J Exp Transl Clin. 2020 Jan 28;6(1):2055217319899695. doi: 10.1177/2055217319899695 (PMC6990617; doi:10.1177/2055217319899695), 2020-01-28

# Supplementaryfigure

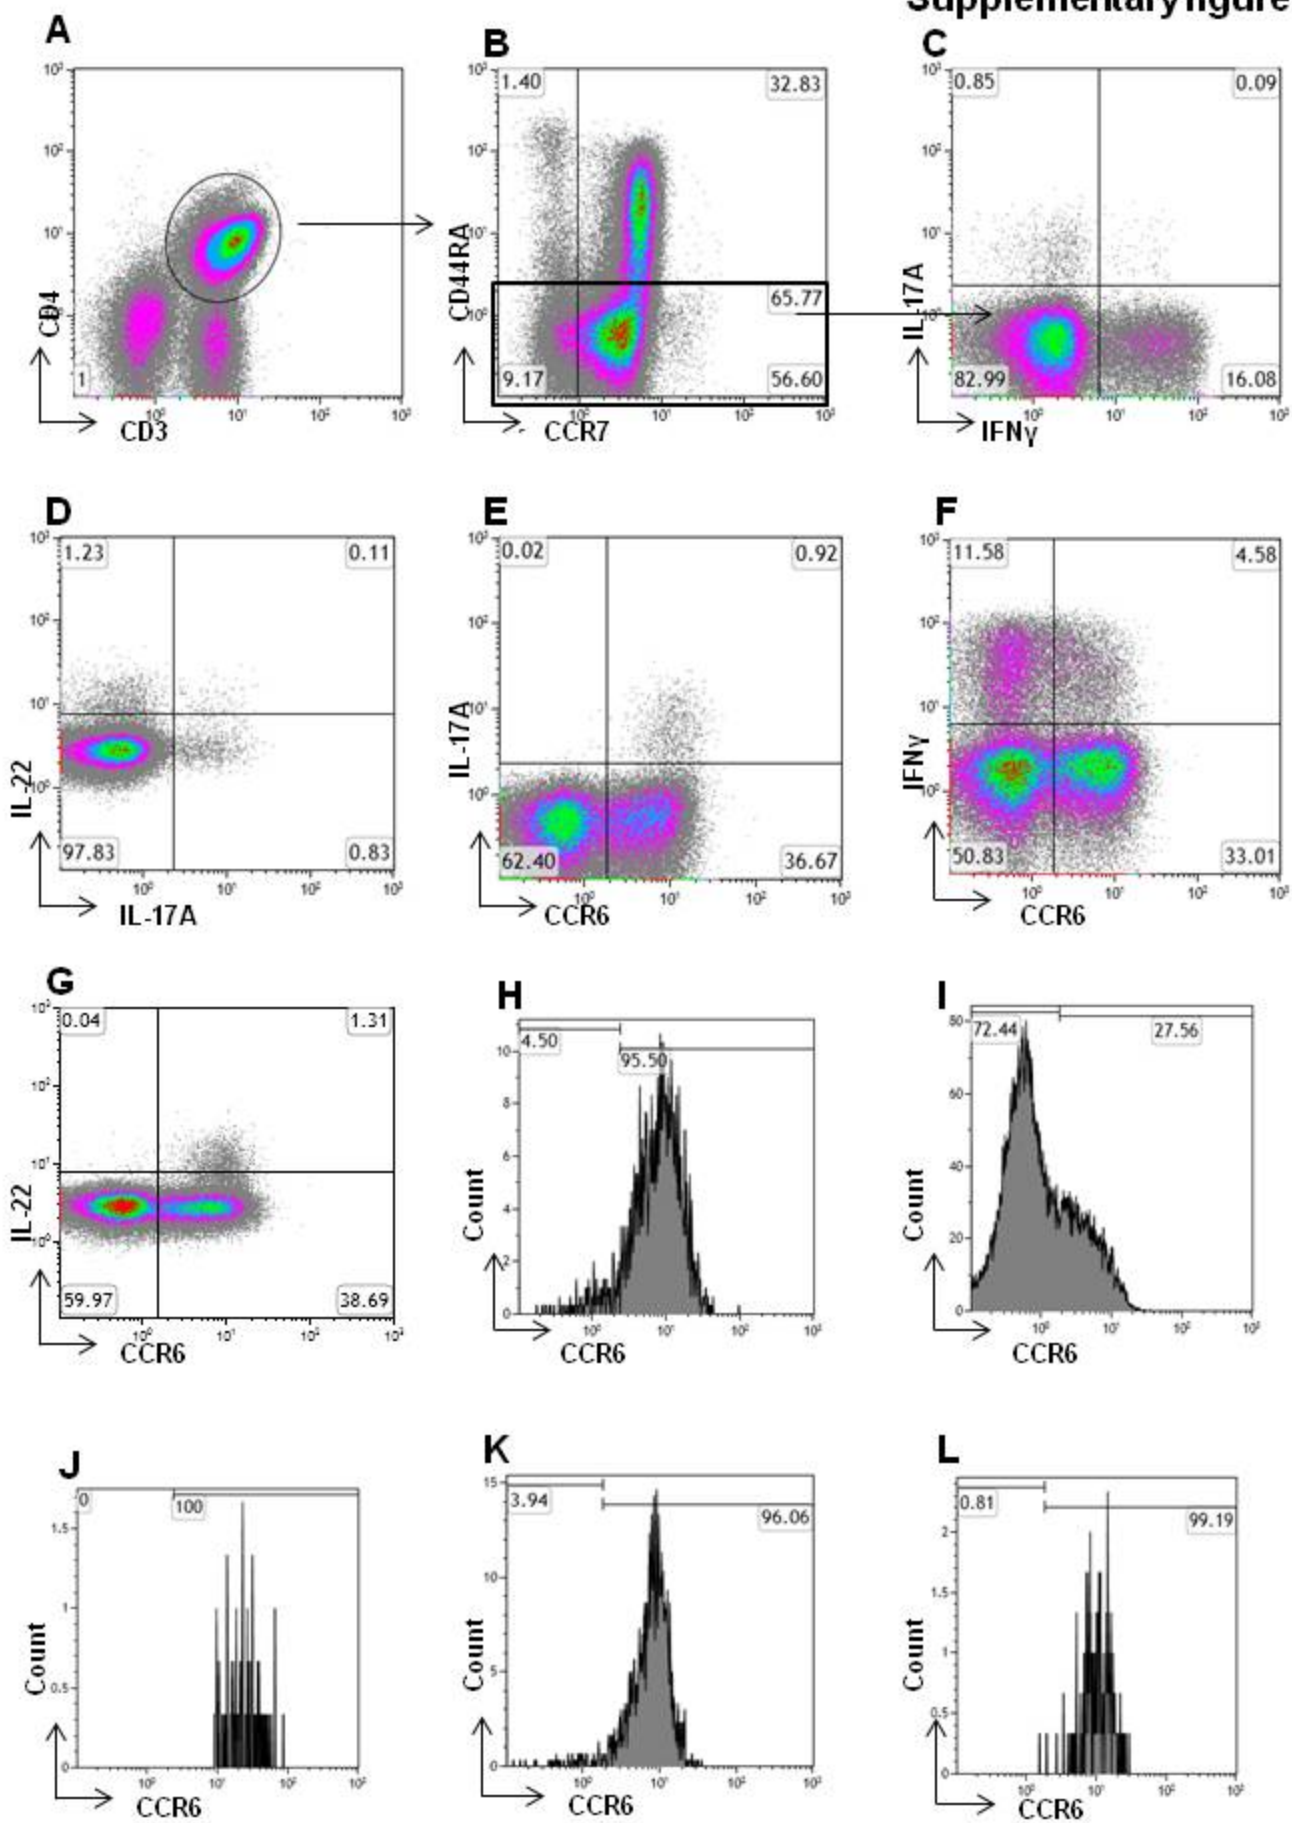

Supplement: MSO899695_Supplemental_Figure.pdf [file MSO899695_Supplemental_Figure.pdf]
